# Supplementary material
Source: PubMed Central journal article supplement (PMC6204906)
Supplement: supp_RA118.004998_139587_1_supp_200680_pky7vr.pdf [file supp_RA118.004998_139587_1_supp_200680_pky7vr.pdf]

Supporting Information

**CD16a with oligomannose-type N-glycans is the only “low affinity” Fc  $\gamma$  receptor that binds the IgG crystallizable fragment with high affinity in vitro**

Ganesh P. Subedi and Adam W. Barb

Roy J. Carver Department of Biochemistry, Biophysics and Molecular Biology  
Iowa State University, Ames, IA 50011

Including:

Table S1

Figure S1

Figure S2

Figure S3

**Table S1.** Binding affinity measurements for IgG1 Fc and receptor glycovariants and amino acid variants.

|                                    | Fucosylated IgG1-Fc              |                                  |                                    |     | Afucosylated IgG1-Fc            |                                 |                                   |     |
|------------------------------------|----------------------------------|----------------------------------|------------------------------------|-----|---------------------------------|---------------------------------|-----------------------------------|-----|
|                                    | G0F<br>K <sub>D</sub> (nM) ± err | G2F<br>K <sub>D</sub> (nM) ± err | A2G2F<br>K <sub>D</sub> (nM) ± err |     | G0<br>K <sub>D</sub> (nM) ± err | G2<br>K <sub>D</sub> (nM) ± err | A2G2<br>K <sub>D</sub> (nM) ± err |     |
| <b>Complex-Type Receptors</b>      | <b>N-glycan Composition</b>      |                                  |                                    |     |                                 |                                 |                                   |     |
|                                    |                                  |                                  |                                    |     |                                 |                                 |                                   |     |
| <b>Oligomannose-Type Receptors</b> |                                  |                                  |                                    |     |                                 |                                 |                                   |     |
| rCD16a-Man5                        | 25                               | 17                               | 13                                 | 9   | 21                              | 1                               | 1                                 | 1   |
| rCD16b-Man5                        | 3300                             | 120                              | 1500                               | 100 | 1300                            | 80                              | 190                               | 20  |
| rCD32a-Man5                        | 720                              | 60                               | 480                                | 40  | 450                             | 40                              | 440                               | 30  |
| rCD32b-Man5                        | 3000                             | 200                              | 1900                               | 200 | 1700                            | 120                             | 1700                              | 200 |
| <b>CD16a Variants</b>              |                                  |                                  |                                    |     |                                 |                                 |                                   |     |
|                                    |                                  |                                  |                                    |     |                                 |                                 |                                   |     |
| rCD16a-CT N38Q/N74Q/N169Q          | 56                               | 4                                | 26                                 | 1   | 7.8                             | 0.5                             | 1.0                               | 0.1 |
| rCD16a-CT N162Q                    | 150                              | 80                               | 80                                 | 20  | 88                              | 20                              | 130                               | 10  |
| rCD16a-CT N45Q                     | 1200                             | 130                              | 590                                | 50  | 130                             | 10                              | 870                               | 30  |
| rCD16a-CT N45Q/N162Q               | 340                              | 30                               | 160                                | 20  | 160                             | 20                              | 500                               | 200 |
| rCD16a-Man5 N38Q/N74Q/N169Q        | 4.0                              | 0.2                              | 1.9                                | 0.1 | 1.5                             | 1.0                             | 1.6                               | 0.3 |
| rCD16a-Man5 N162Q                  | 63                               | 3                                | 34                                 | 2   | 38                              | 3                               | 329                               | 26  |
| rCD16a-Man5 N45Q                   | 32                               | 4                                | 17                                 | 1   | 12                              | 1                               | 765                               | 31  |
| rCD16a-Man5 N45Q/N162Q             | 285                              | 6                                | 105                                | 8   | 83                              | 14                              | 1350                              | 131 |
| <b>Afucosylated CD16a</b>          |                                  |                                  |                                    |     |                                 |                                 |                                   |     |
|                                    |                                  |                                  |                                    |     |                                 |                                 |                                   |     |
| rCD16a-CT                          | 260                              | 20                               | 140                                | 10  | 23                              | 2                               | 1.0                               | 0.3 |
| rCD16a-CT N38Q/N74Q/N169Q          | 120                              | 20                               | 70                                 | 7   | 6                               | 3                               | 440                               | 30  |
| rCD16a-CT N162Q                    | 100                              | 10                               | 55                                 | 4   | 60                              | 5                               | 1700                              | 200 |

\* - Values reported in Subedi and Barb (2016) MAbs 8(8):1512-1524 doi: 10.1080/19420862.2016.1218566

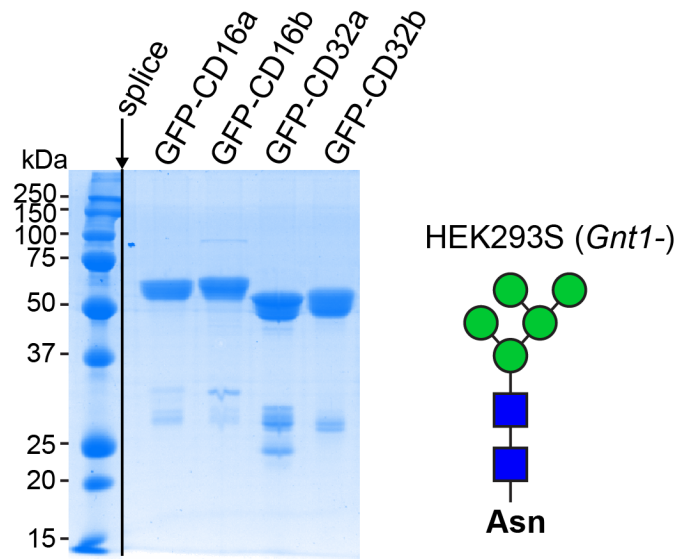

**Figure S1.** SDS-PAGE analysis of low affinity Fc  $\gamma$  receptors extracellular fragments expressed with HEK293S (*Gnt1*-) cells. Receptors were expressed with an N-terminal green fluorescent protein (GFP) fusion containing a His8 purification tag. These proteins contain primarily Man5 N-glycans. This gel image was spliced to remove lanes not pertinent to the expression of Fc  $\gamma$  receptors HEK293S (*Gnt1*-) cells.

```

                                     38      45
                                     |      |
CD16a      1  RTEDLPKAVVFLEPQWYRVVLEKDSVTLKCGAYS PEDNSTQWFHNESLISSQASSYFIDA
CD16b      1  RTEDLPKAVVFLEPQWYSVVLEKDSVTLKCGAYS PEDNSTQWFHNESLISSQASSYFIDA
CD32a      1  QAAAPPKAVLKLEPPWINV LQEDSVTLTCQGARS PESDSIQWFHNGNLIPTHTQPSYRFK
CD32b      1  TPAAPPKAVLKLEPQWINV LQEDSVTLTCRGT HS PESDSIQWFHNGNLIPTHTQPSYRFK
CD32c      1  TPAAPPKAVLKLEPQWINV LQEDSVTLTCRGT HS PESDSIQWFHNGNLIPTHTQPSYRFK
          .   ****: *** *   **:*****.**: * **.* ***** .**.:... :

                                     74
                                     |
CD16a      61  ATVDDSGEYRCQTNLSTLSDPVQLEVHIGWLLLQAPRWVFKEEDPIHLRCHSWKNTALHK
CD16b      61  ATVNDSGEYRCQTNLSTLSDPVQLEVHIGWLLLQAPRWVFKEEDPIHLRCHSWKNTALHK
CD32a      61  ANNNDSGEYTCQTGQTSLSDPVH LTVLSEWLVLQTPHLEFQEGETIMLRCHSWKDKPLVK
CD32b      61  ANNNDSGEYTCQTGQTSLSDPVH LTVLSEWLVLQTPHLEFQEGETIVLRCHSWKDKPLVK
CD32c      61  ANNNDSGEYTCQTGQTSLSDPVH LTVLSEWLVLQTPHLEFQEGETIVLRCHSWKDKPLVK
          *. :***** ***. :*****:* *   **:***: *:* :.* *****:..* *

                                     162    169
                                     |      |
CD16a      121 VTYLQNGKGRKYFHHNSDFYIPKATLKDSGSYFCRGLVGSKNVSSETV NITITQG
CD16b      121 VTYLQNGKDRKYFHHNSDFHIPKATLKDSGSYFCRGLVGSKNVSSETV NITITQG
CD32a      121 VTFFQNGKSKKFSRSLDPTFSIPQANHSHSGDYHCTGNIGYTLFSSKPV TITVQV-
CD32b      121 VTFFQNGKSKKFSRSDPNF SIPQANHSHSGDYHCTGNIGYTLYSSKPV TITVQA-
CD32c      121 VTFFQNGKSKKFSRSDPNF SIPQANHSHSGDYHCTGNIGYTLYSSKPV TITVQA-
          **:*****.:*: : . * **:*. .**.*.* * :* . **:*.*.***:

```

**Figure S2.** Sequence alignment of the CD16a (V158), CD16b (NA2), CD32a, CD32b and CD32c extracellular domains studied here. The extracellular antibody-binding domains of CD32b and CD32c are identical. The locations of only four differences in the CD16a and CD16b amino acid sequences are indicated with a red background. Five CD16a N-glycosylation sites are indicated above the sequence.

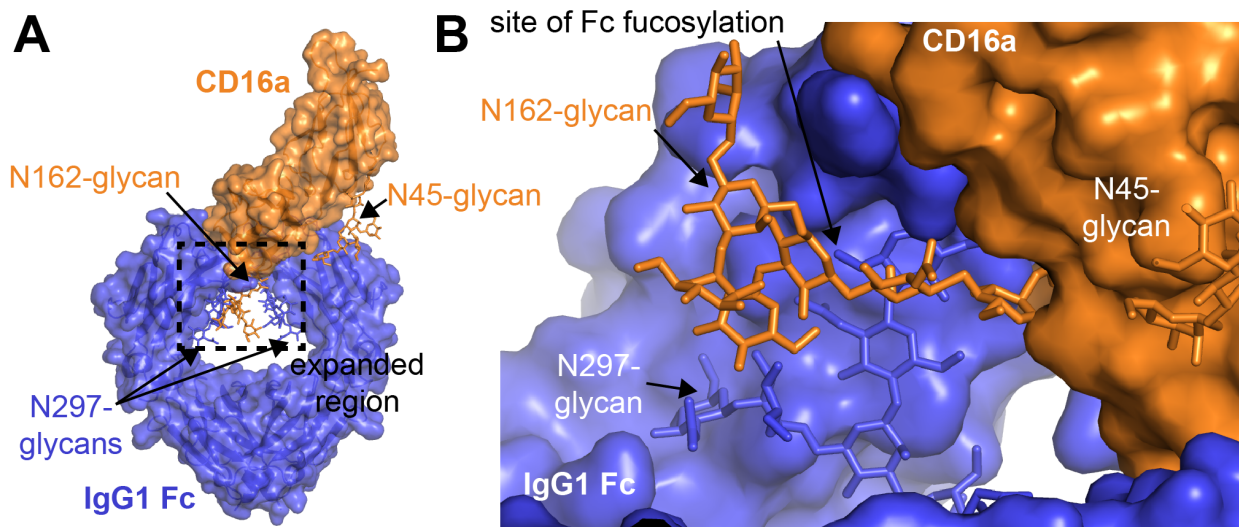

**Figure S3.** The region of the CD16a N162 glycan in the complex formed with IgG1 Fc. Polypeptide and partial N-glycan coordinates are from the PDB 5vu0 (Falconer et al., 2018). Remaining N-glycan coordinates were generated using GLYCAM ([www.glycam.org](http://www.glycam.org)).
